# Supplementary material for: Central Role of Hypothalamic Circuits for Acupuncture's Anti‐Parkinsonian Effects
Source: PubMed Central journal article supplement (PMC11578310; doi:10.1002/advs.202403245), 2024-08-09
Supplement: ADVS-11-2403245-s002.pdf [file ADVS-11-2403245-s002.pdf]

# ADVANCED SCIENCE

Open Access

## Supporting Information

for *Adv. Sci.*, DOI 10.1002/adv.202403245

Central Role of Hypothalamic Circuits for Acupuncture's Anti-Parkinsonian Effects

*Ju-Young Oh, Hyowon Lee, Sun-Young Jang, Hyunjin Kim, Geunhong Park, Almas Serikov, Jae-Hwan Jang, Junyeop Kim, Seulkee Yang, Moonsun Sa, Sung Eun Lee, Young-Eun Han, Tae-Yeon Hwang, Sharon Jiyeon Jung, Hee Young Kim, Seung Eun Lee, Soo-Jin Oh, Jeongjin Kim, Jeongyeon Kim, Jongpil Kim, Thomas J. McHugh, C. Justin Lee, Min-Ho Nam\* and Hi-Joon Park\**

Supporting Information

**Central role of hypothalamic circuits for acupuncture's anti-parkinsonian effects**

*Ju-Young Oh<sup>†</sup>, Hyowon Lee<sup>†</sup>, Sun-Young Jang, Hyunjin Kim, Geunhong Park, Almas Serikov, Jae-Hwan Jang, Junyeop Kim, Seulkee Yang, Moonsun Sa, Sung Eun Lee, Young-Eun Han, Tae-Yeon Hwang, Sharon Jiyeon Jung, Hee Young Kim, Seung Eun Lee, Soo-Jin Oh, Jeongjin Kim, Jeongyeon Kim, Jongpil Kim, Thomas J. McHugh, C. Justin Lee, Min-Ho Nam<sup>\*</sup>, Hi-Joon Park<sup>\*</sup>*

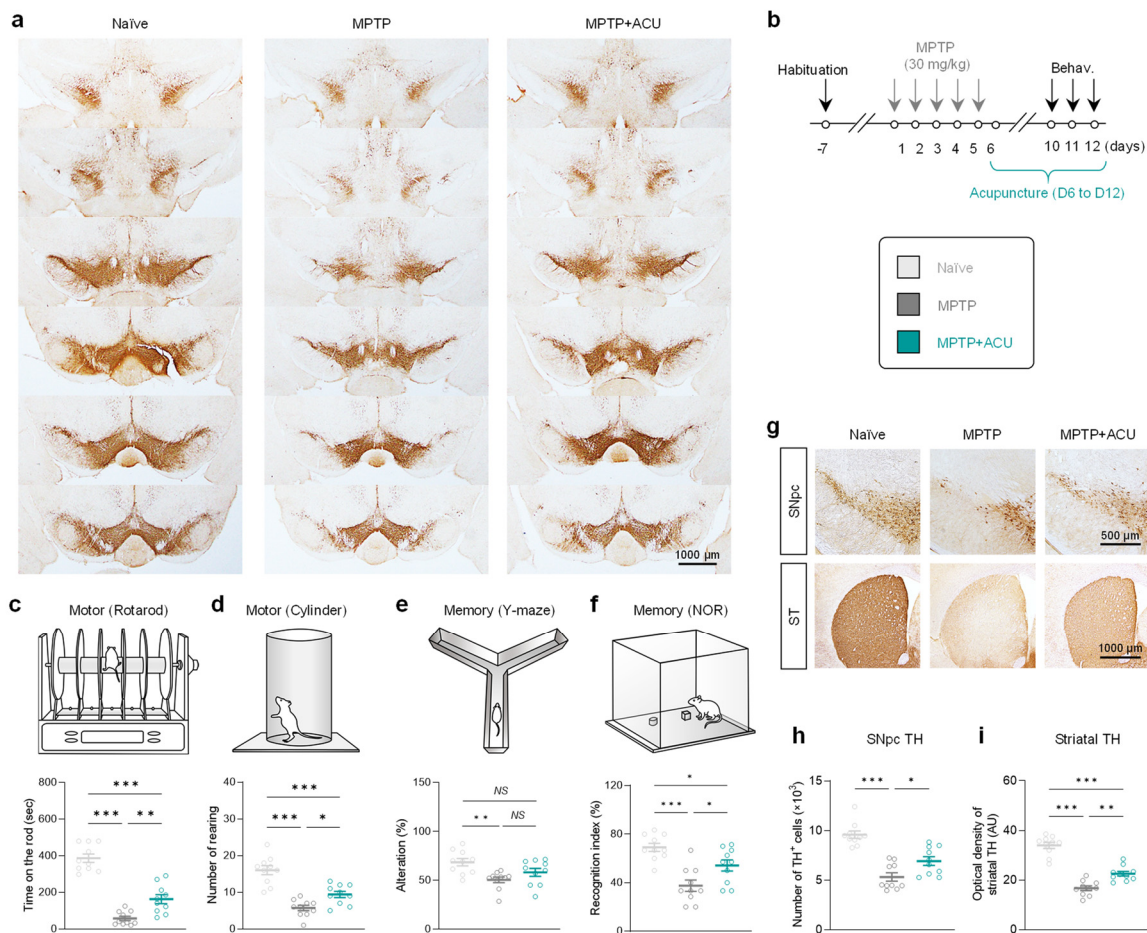

**Figure S1. Representative images of serially sectioned SNpc tissues stained with TH antibody and therapeutic effects of acupuncture starting after MPTP treatment.** a) TH-positive neurons from the rostral to the caudal portions of the SNpc. b) Timeline of experiments to investigate the therapeutic effect of acupuncture which started after MPTP administration (post-ACU). c-f) Assessment of motor and memory functions. Post-ACU treatment for one week after induction of the MPTP model has a therapeutic effect for motor dysfunction (One-way ANOVA,  $n = 10$  per group; for rotarod:  $F_{2,27} = 66.2$ ,  $p < 0.001$ ; for cylinder:  $F_{2,27} = 29.6$ ,  $P < 0.001$ ; *post-hoc* Tukey's test: \*\*\*  $p < 0.001$ , \*\*  $p < 0.01$ , \*  $p < 0.05$ ) and memory impairment (Kruskal-Wallis ANOVA for Y-maze,  $n = 10$  per group:  $H_3 = 9.547$ ,  $P = 0.008$ ; One-way ANOVA for NOR,  $n = 10$  per group:  $F_{2,27} = 14.1$ ,  $p < 0.001$ ; *post-hoc* Tukey's test: \*\*\*  $p < 0.001$ , \*\*  $p < 0.01$ , \*  $p < 0.05$ , NS, not significant). g) Representative images of TH expression in SNpc and striatum in MPTP model with or without post-ACU. h,i) Quantification of the number of TH-positive neurons and optical density of striatal TH expression. Post-ACU treatment partially but significantly restored the expression of TH level in the SNpc and striatum (H, Kruskal-Wallis ANOVA for SNpc,  $n = 10$  per group:  $H_3 = 20.20$ ,  $p < 0.001$ ; I, One-way ANOVA for striatum,  $n = 10$  per group:  $F_{2,27} = 69.7$ ,  $p < 0.001$ ; *post-hoc* Tukey's test: \*\*\*  $p < 0.001$ , \*\*  $p < 0.01$ , \*  $p < 0.05$ ). Data are shown as mean  $\pm$  SEM.

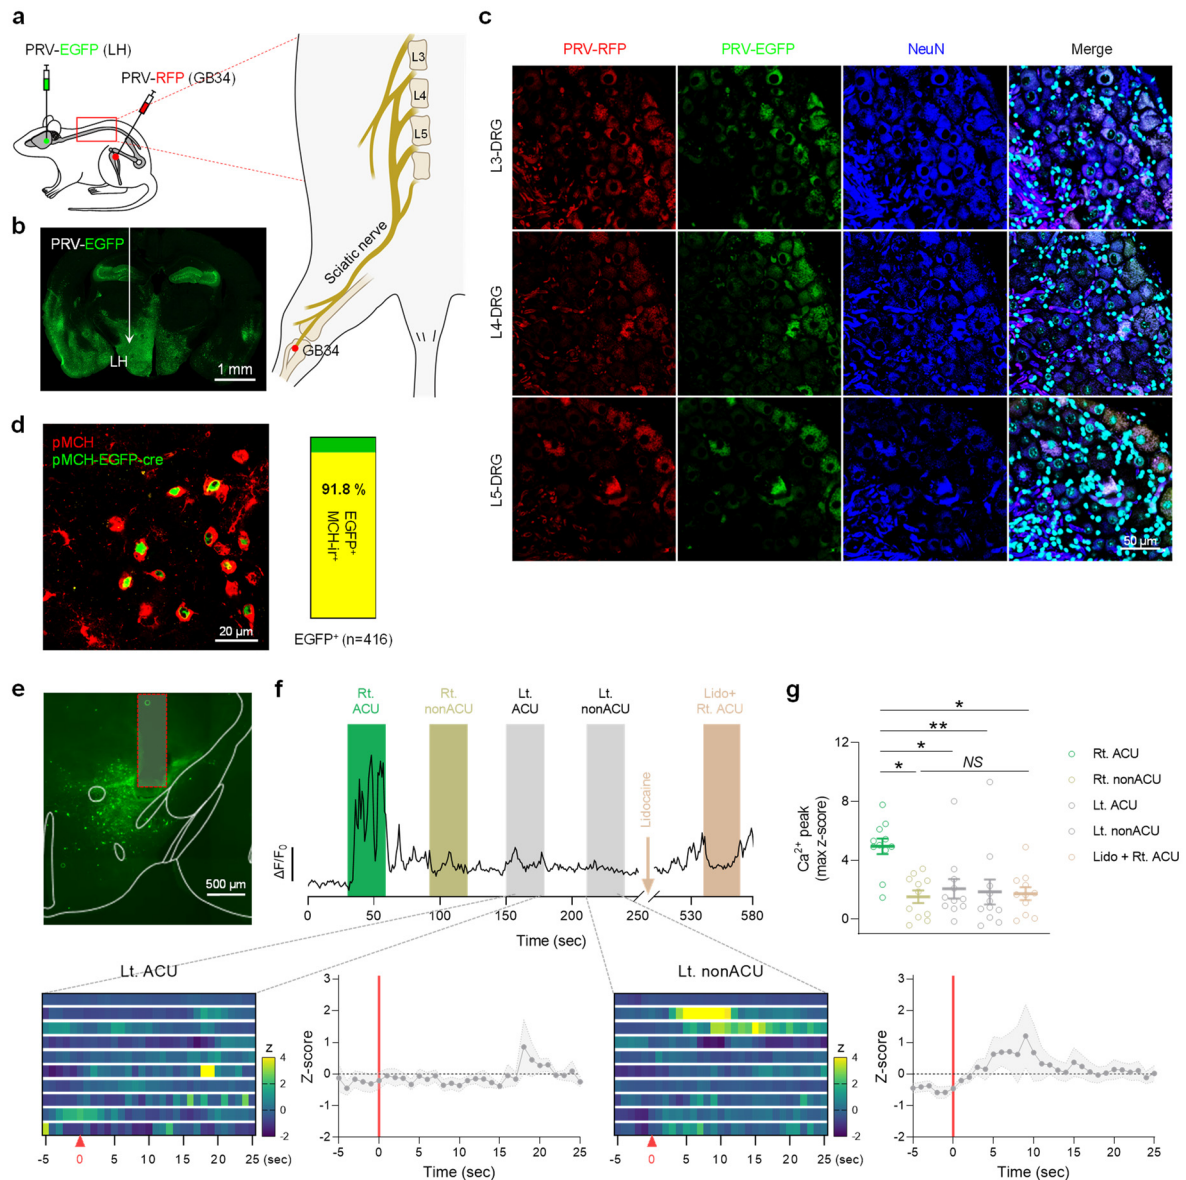

**Figure S2. The trans-synaptic retrograde labeling for visualization of neural pathways from hindlimb acupoint GB34 to the LH/ZI.** a) Schematic diagram depicting the injection strategy with double retrograde PRVs. PRV-CMV-RFP and PRV-CMV-EGFP were injected into the GB34 and LH, respectively. b) Representative immunofluorescent image demonstrating the PRV-EGFP infection in the LH c) Representative confocal images of DRG (L3 to L5) demonstrating double labeled neurons with PRV-RFP and PRV-EGFP. d) Left, the representative confocal image of pMCH-immunoreactivity and EGFP which is expressed by AAV<sub>DJ</sub>-pMCH-EGFP-cre virus injection into the mouse LH. Right, Quantification of co-expression of pMCH-EGFP-cre and pMCH (N = 4 mice, n = 416 cells) reveals that EGFP expression was specifically restricted to pMCH-immunolabeled neurons (91.8%, n = 335 cells). e) GRIN lens position and GCaMP6f expression in the LH. f) Top, a representative trace of Ca<sup>2+</sup> signal of a pMCH neuron upon various acupuncture stimulations. Bottom, heatmaps displaying Ca<sup>2+</sup> signal of each pMCH neuron and averaged traces of Ca<sup>2+</sup> signal of pMCH neurons. g) Quantification of Ca<sup>2+</sup> peak displayed by a scatter plot. The peak Ca<sup>2+</sup> signals were significantly increased only by the acupuncture treatment at right GB34. (Kruskal-Wallis ANOVA, n = 11 per group;  $H_5 = 16.23, p = 0.003$ ; *post-hoc* Dunnett's test: \*\*  $p < 0.01$ , \*  $p < 0.05$ , NS, not significant). Data are shown as mean  $\pm$  SEM.



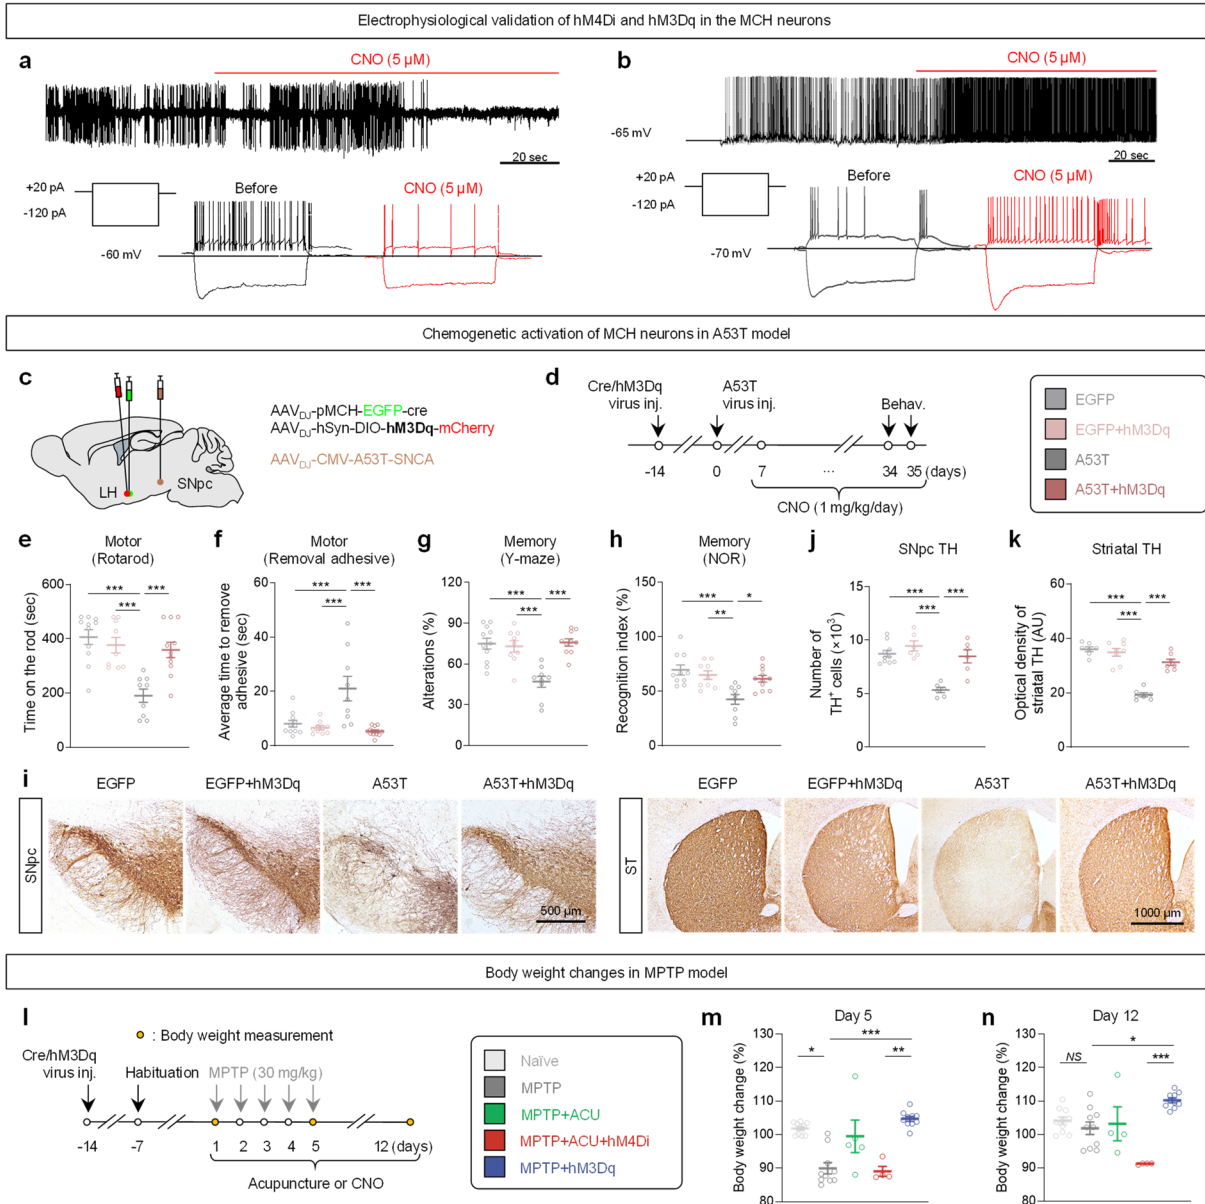

**Figure S3. Activation of MCH neurons alleviates parkinsonian motor and memory deficits in two different PD mouse models.** a) Electrophysiological validation of hM4Di. Top, cell-attached patch clamp recording of spontaneous action potential before and after bath application of CNO (5  $\mu$ M). Bottom, current clamp recording of action potential induced by current injection (+20 pA). b) Electrophysiological validation of hM3Dq. Top, current clamp recording of spontaneous firing. Bottom, current clamp recording of action potential induced by current injection (+20 pA). c) Schematic diagram depicting viral strategy for testing chemogenetic approach in A53T model. d) Experimental timeline of chemogenetic activation of MCH neurons in A53T model. e-h) Assessment of motor and memory function by rotarod test, adhesive removal test, Y-maze test, and novel object recognition test. Chemogenetic activation of pMCH<sup>LH/ZI</sup> neurons alleviated the motor dysfunction (e,f; Kruskal-Wallis ANOVA for rotarod:  $H_4 = 17.92$ ,  $p < 0.001$ ; One-way ANOVA for removal adhesive:  $F_{3,36} = 10.4$ ,  $P < 0.001$ ; *post-hoc* Tukey's test:  $***p < 0.001$ ,  $**p < 0.01$ ,  $*p < 0.05$ ) and memory deficits (g,h; One-way ANOVA; for Y-maze:  $F_{3,35} = 12.7$ ,  $p < 0.001$ ; for NOR:  $F_{3,35} = 8.10$ ,  $p < 0.001$ ; *post-hoc* Tukey's test:  $***p < 0.001$ ,  $**p < 0.01$ ,  $*p < 0.05$ ) in A53T model. i, Representative images of TH staining in the SNpc and striatum. j,k) Quantification of the number of TH-positive neurons and optical density of striatal TH expression. The number of TH-positive cells

in the SNpc and the optical density of TH-positive dopaminergic fibers in the striatum were restored by chemogenetic activation of pMCH<sup>LH/ZI</sup> neurons in the A53T model (One-way ANOVA; for SNpc:  $F_{3, 24} = 17.5$ ,  $p < 0.001$ ; for striatum:  $F_{3, 25} = 46.4$ ,  $p < 0.001$ ; *post-hoc* Tukey's test: \*\*\* $p < 0.001$ ). l) Timeline of experiments for MPTP model. m,n) Acupuncture and chemogenetic activation of MCH neurons reverses MPTP-induced body weight loss at day 5 (Kruskal-Wallis ANOVA; for day 5:  $H_5 = 26.60$ ,  $p < 0.001$ ; for day 12:  $H_5 = 20.42$ ,  $p < 0.001$ ; *post-hoc* Tukey's test: \*\*\* $p < 0.001$ , \*\* $p < 0.01$ , \* $p < 0.05$ ). Data are shown as mean  $\pm$  SEM.

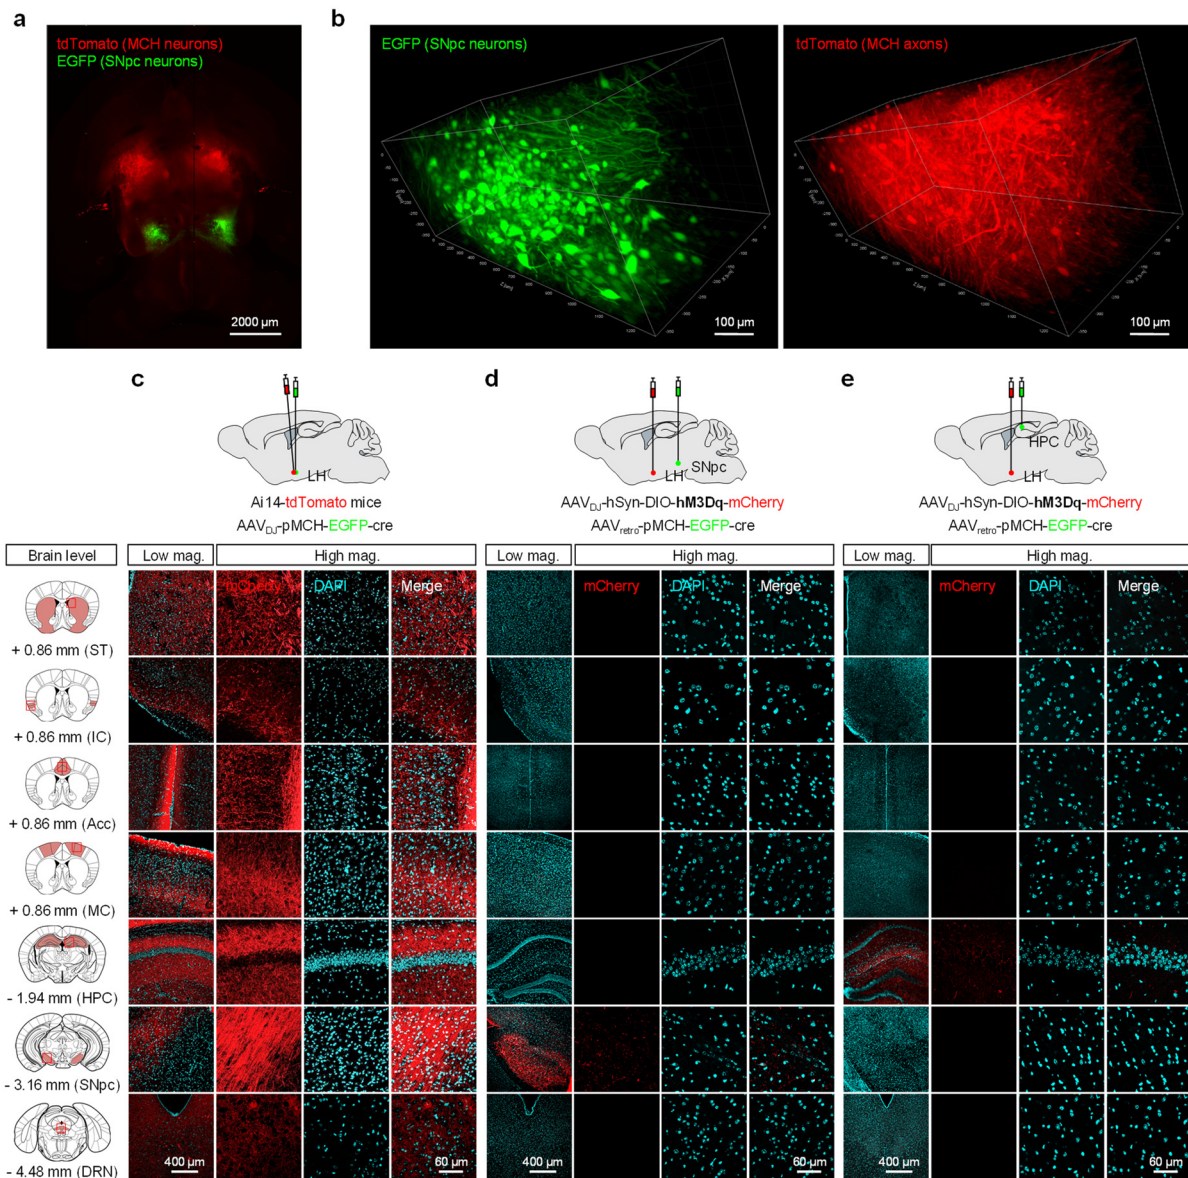

**Figure S4. Anatomical analysis of MCH neuronal projections and Intrinsic electrophysiological properties of MCH<sup>LH/ZI</sup>→SNpc and MCH<sup>LH</sup>→HPC neurons.** a) Three-dimensional rendering of a cleared mouse brain showing brain-wide injection patterns of MCH neurons labeled by tdTomato and EGFP (SNpc neurons) in the Ai14 (Rosa26-Stop-tdTomato) mouse. b) SNpc neurons (EGFP) co-expressed with axons of MCH neurons projected from LH (tdTomato) in the SNpc. The merged image is displayed in Figure 4b (middle). c-e) Confocal images of striatum (ST), insular cortex (IC), anterior cingulate cortex (ACC), motor cortex (MC), hippocampus (HPC), substantia nigra pars compacta (SNpc), dorsal raphe nucleus (DRN) in the mice of tdTomato-labeling within MCH<sup>LH/ZI</sup> neurons (c), MCH<sup>LH/ZI</sup>→SNpc neurons (d), and MCH<sup>LH</sup>→HPC neurons (e).

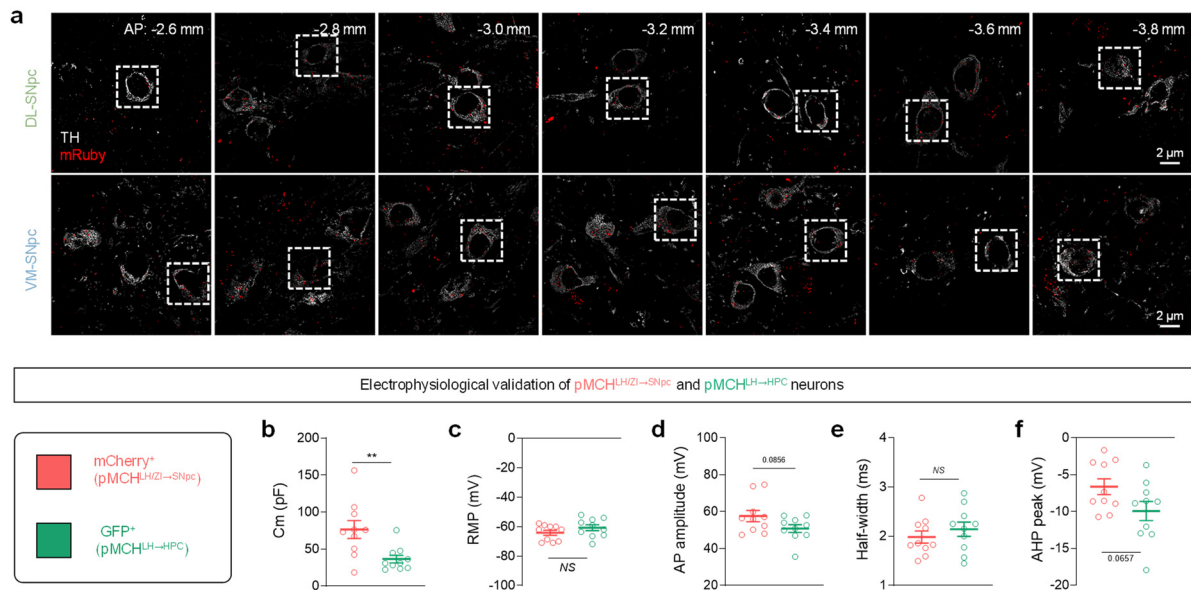

**Figure S5. MCH neuronal projections are originated from discrete neuronal subpopulations.** a) Lattice-SIM image of synaptophysin::mRuby near the TH-positive neurons in the SNpc. b) Membrane capacitance (two-tailed unpaired t-test,  $n = 10$  per group;  $t_{18} = 3.053$ ,  $p = 0.007$ ). c) Resting membrane potential (two-tailed unpaired t-test,  $n = 10$  per group;  $t_{18} = 1.303$ ,  $p = 0.2088$ ). d) AP amplitude (two-tailed unpaired t-test,  $n = 10$  per group;  $t_{18} = 1.819$ ,  $p = 0.0856$ ). e) AP threshold AP half-width (two-tailed unpaired t-test,  $n = 10$  per group;  $t_{18} = 0.8436$ ,  $p = 0.4100$ ). f) After-hyperpolarization peak (two-tailed unpaired t-test,  $n = 10$  per group;  $t_{18} = 1.960$ ,  $p = 0.0657$ ). Data are shown as mean  $\pm$  SEM.

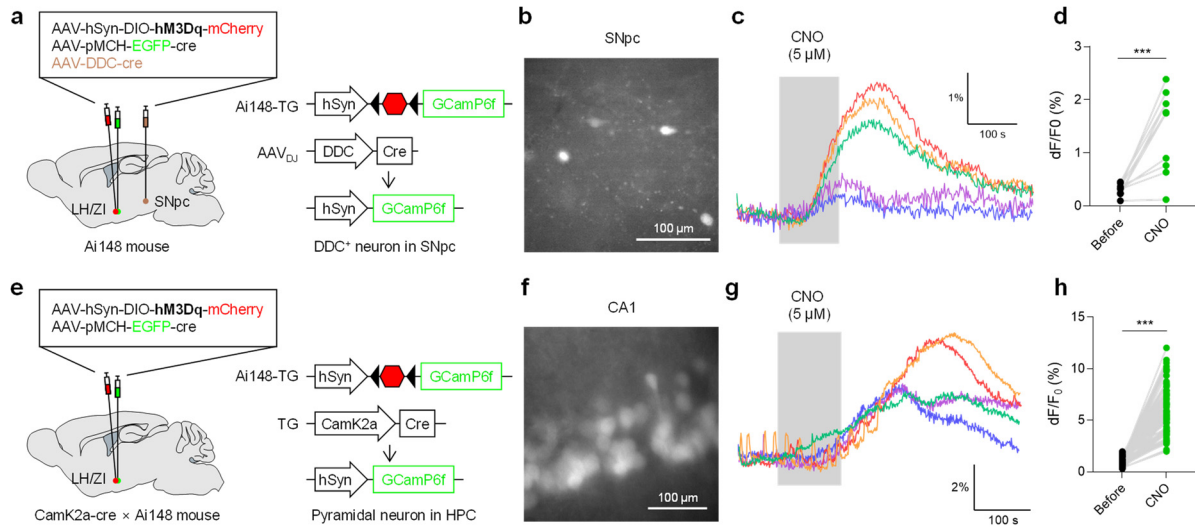

**Figure S6. Functional connection of the discrete neural projections of MCH neurons from LH and ZI to SNpc and HPC.** a,e) Schematic diagram of *ex vivo*  $\text{Ca}^{2+}$  imaging of SNpc dopaminergic neurons (a) and CA1 hippocampal pyramidal neurons (e) upon hM3Dq-mediated chemogenetic activation of MCH<sup>LH/ZI</sup> neurons. b,f) Representative images of GCaMP6f expression in SNpc (b) and CA1 HPC (f). c,g)  $\text{Ca}^{2+}$  signal traces of SNpc dopaminergic neurons (c) and CA1 hippocampal pyramidal neurons (g). d,h) Quantification of  $\text{Ca}^{2+}$  peak upon chemogenetic activation of MCH neurons in each region (two-tailed unpaired t-test; SNpc,  $n = 10$  per group,  $t_{18} = 4.593$ ,  $p < 0.001$ ; CA1,  $n = 101$  per group,  $t_{200} = 21.52$ ,  $p < 0.001$ ).



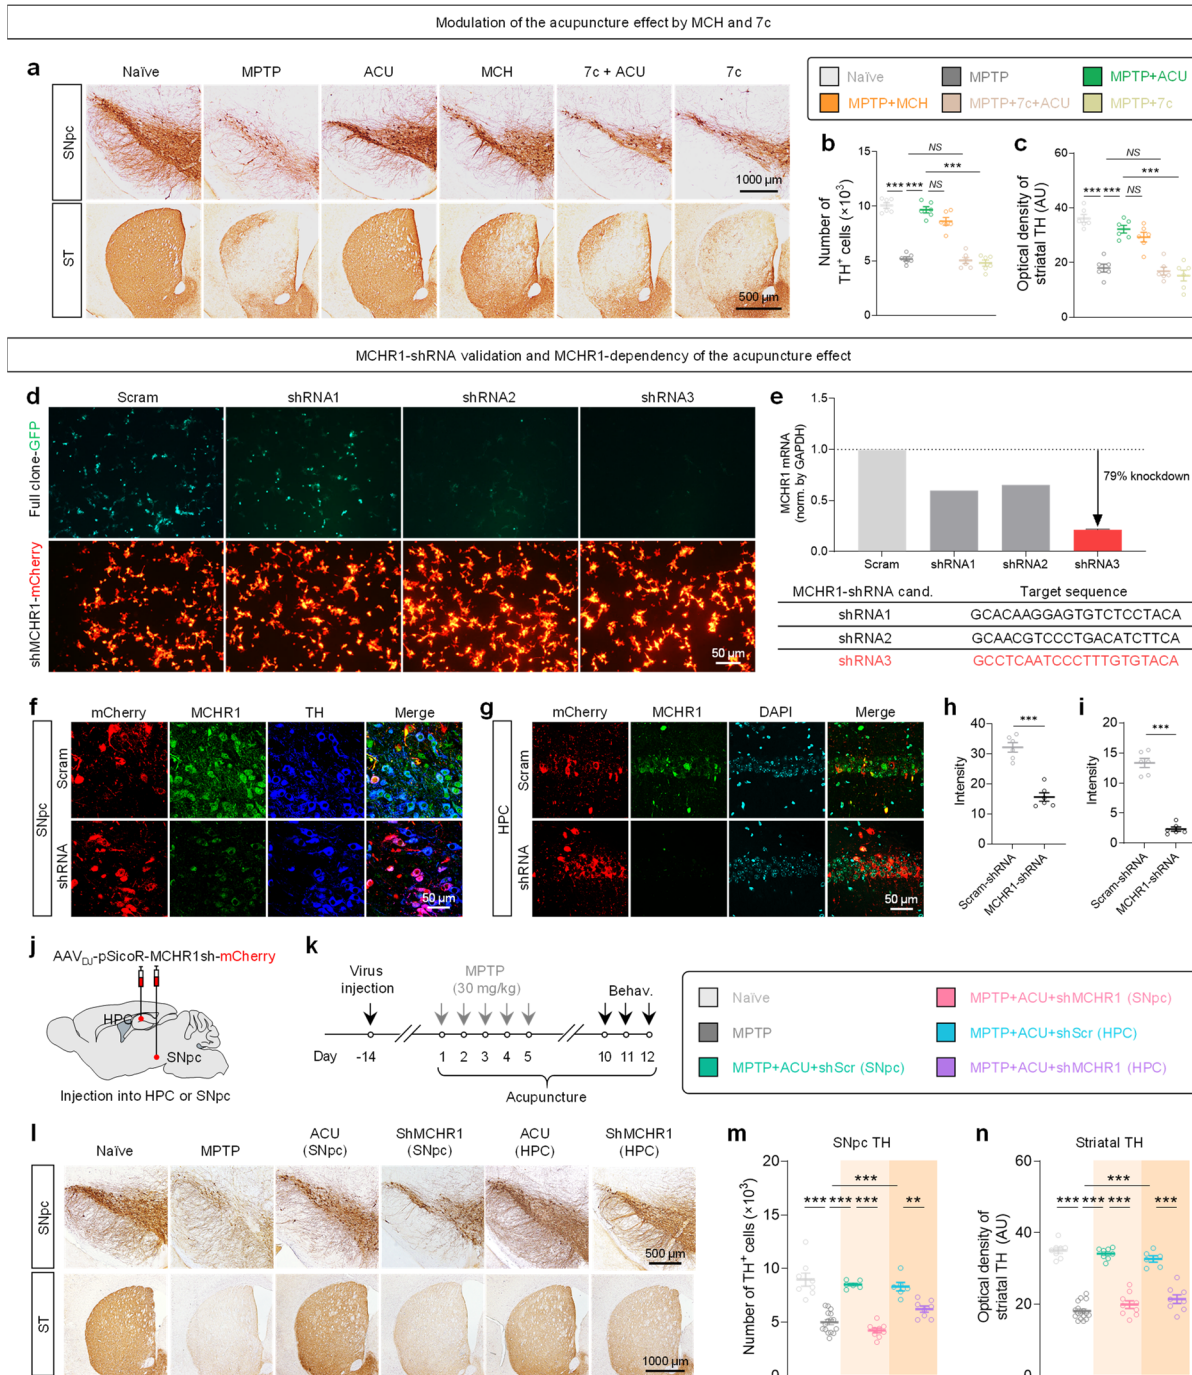

**Figure S7. MCHR1 gene-silencing blocks the acupuncture effect.** a) Representative images of TH expression in the SNpc and striatum. b) Numbers of TH-positive dopaminergic neurons in the SNpc (One-way ANOVA,  $n = 6$  per group:  $F_{5,30} = 78.9$ ,  $p = 0.855$ ; *post-hoc* Tukey's test:  $***p < 0.001$ , NS, not significant). c) Quantification of optical density of striatal TH (One-way ANOVA,  $n = 6$  per group:  $F_{5,30} = 32.4$ ,  $p = 0.962$ ; *post-hoc* Tukey's test:  $***p < 0.001$ , NS, not significant). d) Representative fluorescent images of HEK293T cells displaying the expression of shRNA candidates (mCherry) and the reduced expression of MCHR1 full clone (GFP) 24 h after co-transfection of MCHR1 full clone and the shRNA candidates. e) Top, *in vitro* knockdown efficiency of MCHR1-shRNA candidates. Relative levels of MCHR1 mRNA expression were quantified by normalizing with GAPDH mRNA. Knockdown efficacy was most pronounced by transfection with shRNA3, showing ~79% decrease compared to Scram non-knockdown control. Bottom, the target sequences of shRNA candidates. f-i) In vivo

knockdown efficiency of MCHR1-shRNA3 in SNpc and HPC, validated by immunohistochemistry. Compared with the Scrambled shRNA, shRNA significantly reduced the intensity of MCHR1 expression in the SNpc (h) and HPC (i) (two-tailed unpaired t-test,  $n = 6$  per group; for SNpc:  $t_{10} = 7.782$ ;  $p < 0.0001$ ; for HPC:  $t_{10} = 13.07$ ;  $p < 0.0001$ ). j) Schematic diagram of the location of the AAV<sub>DJ</sub>-pSicoR-MCHR1sh-mCherry virus injection in the SNpc and HPC. k) Timeline of experiments for *in vivo* gene-silencing of MCHR1 in the MPTP model. l) Representative images of TH staining in the SNpc and striatum. m,n) Quantification of the number of TH-positive neurons and optical density of striatal TH expression. The number of TH-positive cells in SNpc and the optical density of TH-positive dopaminergic fibers in the striatum were significantly blocked by MCHR1 gene-silencing in the SNpc, but less by gene-silencing in the HPC (One-way ANOVA; for SNpc:  $F_{5,47} = 35.0$ ,  $p < 0.001$ ; for striatum:  $F_{5,50} = 89.5$ ,  $p < 0.001$ ; *post-hoc* Tukey's test: \*\*\* $p < 0.001$ , \*\* $p < 0.01$ ). Data are shown as mean  $\pm$  SEM.

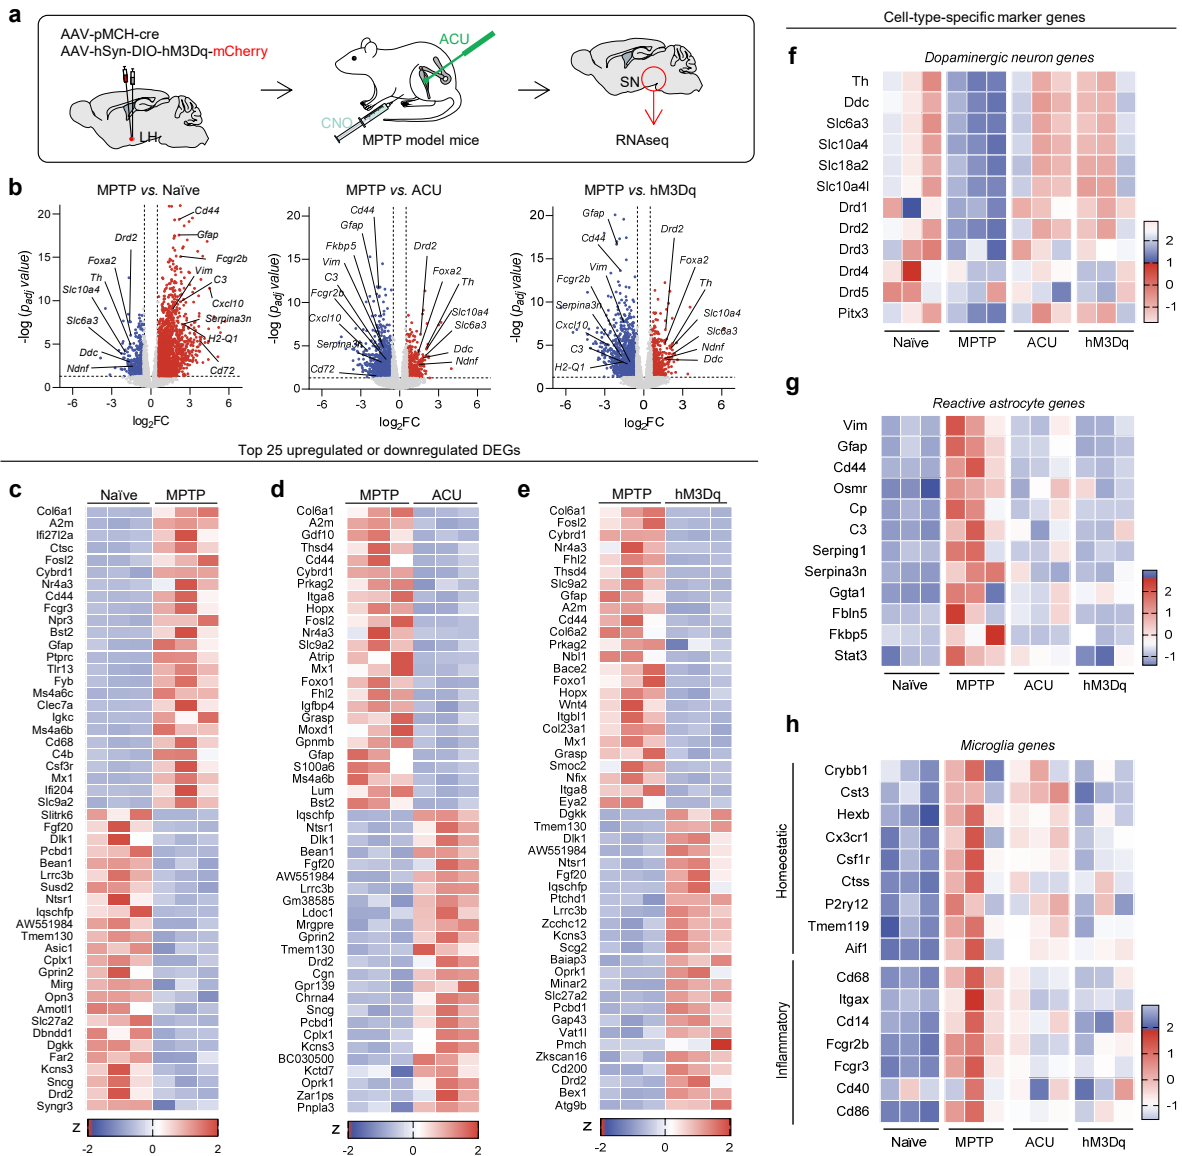

**Figure S8. Transcriptomic change in the SNpc by acupuncture or chemogenetic activation of MCH neurons in MPTP model mice.** A) Schematic diagram of SNpc tissue preparation for RNA-seq. B) Volcano plot displaying the transcriptomic differences in the SNpc between MPTP and Naive (left), between MPTP and ACU (middle), and MPTP and hM3Dq groups (right). Upregulated DEGs are marked in red, while downregulated DEGs are marked in blue. DEGs were defined with the criteria of  $p_{adj} < 0.05$  and  $|FC| > 1.5$ . c) Top 25 upregulated and downregulated SNpc DEGs by MPTP treatment with the highest statistical significance. DEGs were identified by three criteria:  $p_{adj} < 0.05$ ,  $|FC| \geq 1.5$ , and FPKM (in any group)  $> 1.0$ . d) Top 25 downregulated and upregulated SNpc DEGs by acupuncture treatment in MPTP model with the highest statistical significance. E) Top 25 downregulated and upregulated SNpc DEGs by hM3Dq-mediated chemogenetic activation of MCH neurons in MPTP model with the highest statistical significance. F-h) Heatmap showing enriched genes in specific cell types such as DA neurons (f), reactive astrocytes (g), and microglia (h) in the SNpc.

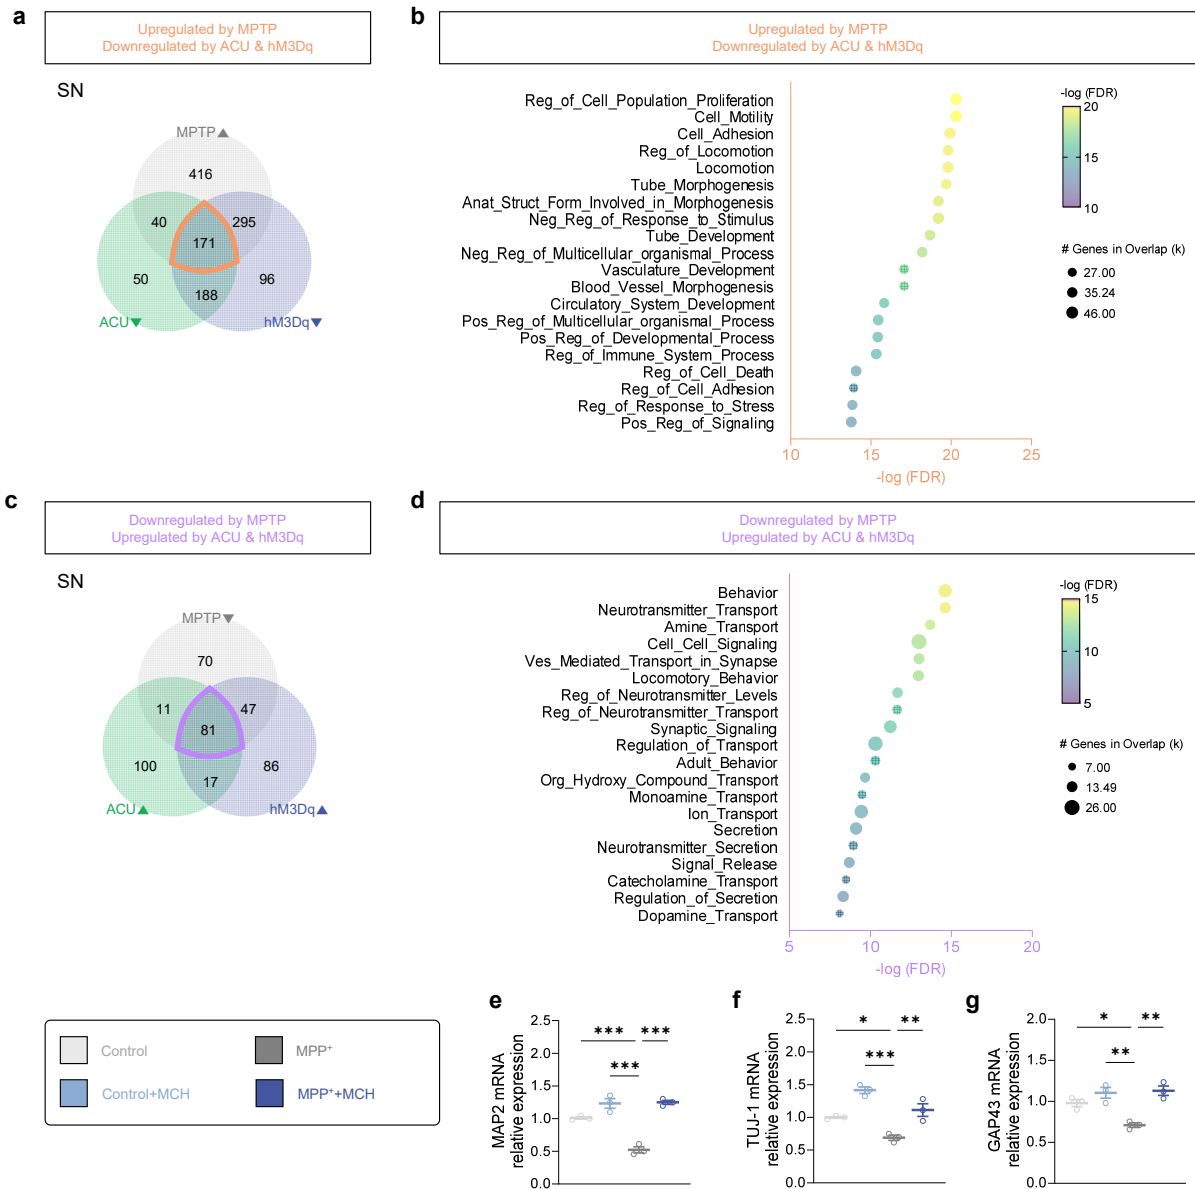

**Figure S9. GO analysis of SNpc DEGs.** A) Venn diagrams depicting the intersection of upregulated DEGs by MPTP (MPTP-up) and downregulated DEGs by either acupuncture or hM3Dq-mediated activation (ACU-down or hM3Dq-down). B) Top 20 gene ontology (GO) terms analyzed from the intersection of MPTP-up, ACU-down, and hM3Dq-down (marked in orange in (a)) with the highest statistical significance. c) Venn diagrams depicting the intersection of downregulated DEGs by MPTP (MPTP-down) and upregulated DEGs by either acupuncture or hM3Dq-mediated activation (ACU-up or hM3Dq-up). Note that many of the terms are related to the cellular reaction upon neuroinflammation. d) Top 20 gene ontology (GO) terms analyzed from the intersection of MPTP-down, ACU-up, and hM3Dq-up (marked in violet in (c)) with the highest statistical significance. Note that many of the terms are related to the synthesis, transport, signaling, and secretion of amine neurotransmitter (especially, dopamine). e-g) mRNA expressions of MAP2 (e), TUJ-1 (f), and GAP43 (g) assessed by RT-qPCR at 5 days after treatment of MCH along with MPP<sup>+</sup> (One-way ANOVA; for MAP2:  $F_{3,8} = 51.49$ ,  $p < 0.001$ ; for TUJ-1:  $F_{3,8} = 26.63$ ,  $p = 0.321$ ; for GAP43:  $F_{3,8} = 14.55$ ,  $p = 0.8207$ ; *post-hoc* Tukey's test: \*\*\*  $p < 0.001$ , \*\*  $p < 0.01$ , \*  $p < 0.05$ ). Data are shown as mean  $\pm$  SEM.

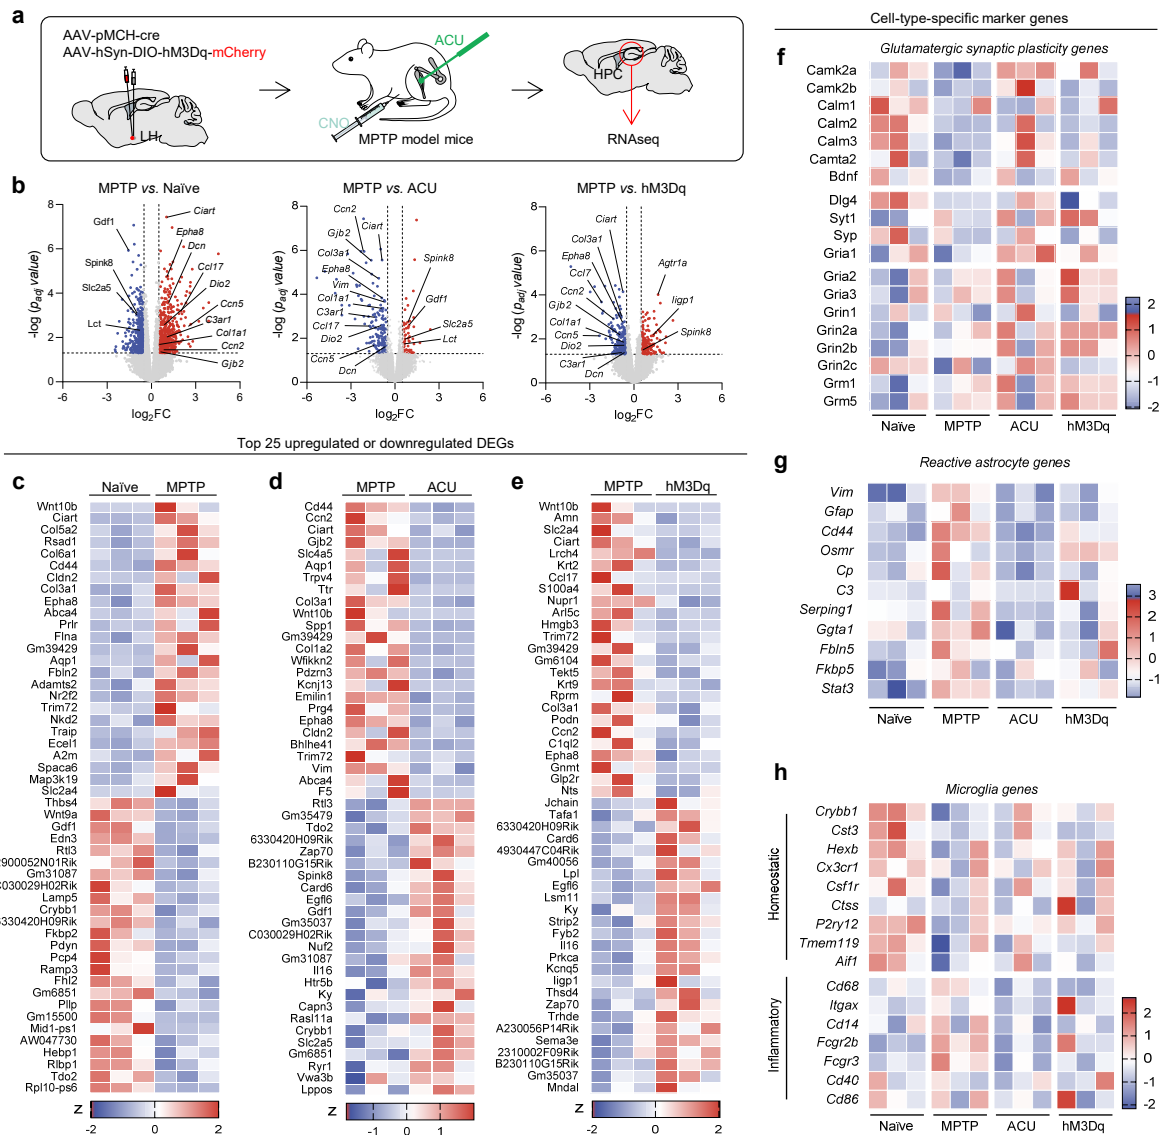

**Figure S10. Transcriptomic change in the HPC by acupuncture or chemogenetic activation of MCH neurons in MPTP model mice.** a) Schematic diagram of HPC tissue preparation for RNA-seq. b) Volcano plot displaying the transcriptomic differences in the hippocampus between MPTP and Naive (left), between MPTP 8 and ACU (middle), and MPTP and hM3Dq groups (right). DEGs were defined with the criteria of  $p < 0.05$  and  $|FC| > 1.5$ . c) Top 25 upregulated and downregulated hippocampal DEGs by MPTP treatment with the highest statistical significance. DEGs were identified by three criteria:  $p < 0.05$ ,  $|FC| \geq 1.5$ , and FPKM (in any group)  $> 1.0$ . d) Top 25 downregulated and upregulated hippocampal DEGs by acupuncture treatment in MPTP model with the highest statistical significance. e) Top 25 downregulated and upregulated hippocampal DEGs by hM3Dq-mediated chemogenetic activation of MCH neurons in MPTP model with the highest statistical significance. f-h) Heatmap showing enriched genes in specific cell types such as glutamatergic synapses (f), reactive astrocytes (g), and microglia (h).



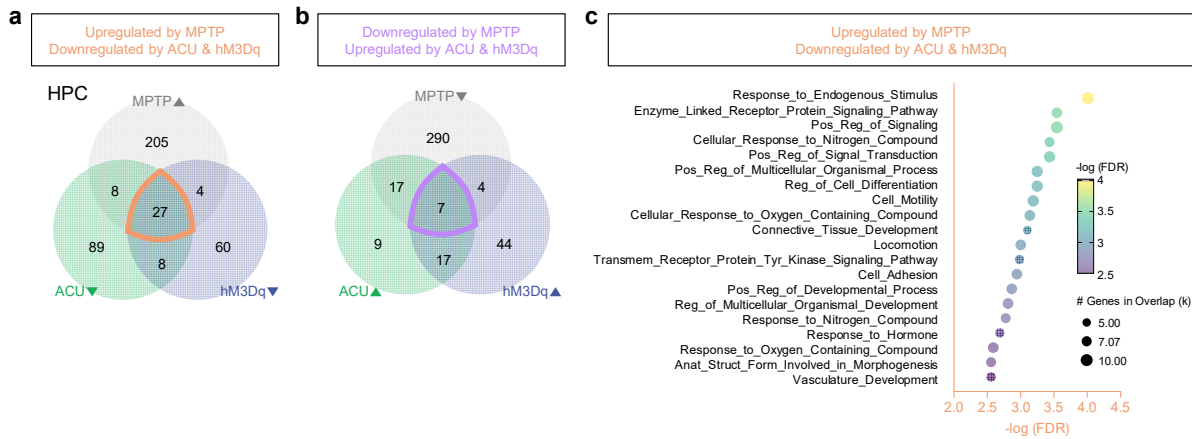

**Figure S11. GO analysis of HPC DEGs.** a) Venn diagrams depicting the intersection of upregulated DEGs by MPTP (MPTP-up) and downregulated DEGs by either acupuncture or hM3Dq-mediated activation (ACU-down or hM3Dq-down). b) Venn diagrams depicting the intersection of downregulated DEGs by MPTP (MPTP-down) and upregulated DEGs by either acupuncture or hM3Dq-mediated activation (ACU-up or hM3Dq-up). c) Top 20 gene ontology (GO) terms analyzed from the intersection of MPTP-up, ACU-down, and hM3Dq-down (marked in orange in (a)) with the highest statistical significance. Due to the small number of genes in the intersection of MPTP-down, ACU-up, and hM3Dq-up (marked in violet in (b)), GO analysis was not available.

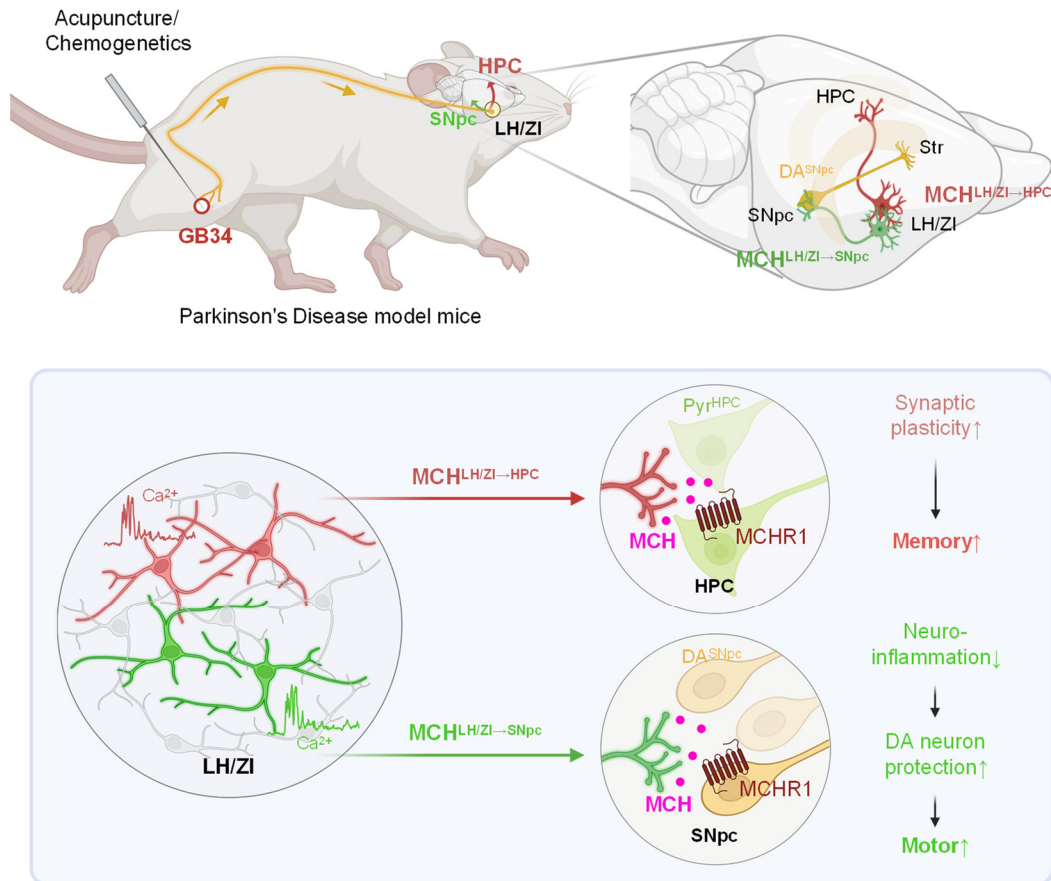

**Figure S12. Schematic diagram of the mechanism underlying the acupuncture effect on motor and non-motor symptoms in the PD mouse model.** Acupuncture stimulation at a hindlimb acupoint GB34 activates the sensory afferents which are connected to the LH/ZI, leading to activation of MCH neurons in the LH and ZI (MCH<sup>LH/ZI</sup> neurons). Likewise, chemogenetic activation of the sensory afferents at GB34 activates the MCH<sup>LH/ZI</sup> neurons. MCH<sup>LH/ZI</sup> neurons project to HPC and SNpc which originate from distinct subpopulations. Activation of MCH<sup>LH→HPC</sup> projections results in enhancement of hippocampal synaptic plasticity which causes memory improvement in the PD mouse model. On the other hand, activation of MCH<sup>LH/ZI→SNpc</sup> projections exerts a strong anti-inflammatory effect through MCHR1-dependent manner, causing the protection of nigrostriatal DA neurons and improving the motor function in the PD mouse model. In summary, activations of MCH<sup>LH→HPC</sup> and MCH<sup>LH/ZI→SNpc</sup> projections are critical for alleviating the memory and motor dysfunction by acupuncture, respectively. Image was created with Biorender.com.

**Table S1. The detailed information about statistical analyses.**

| Figure No. | Result from statistical analysis                                                                                                                                                                                                                                                                                                                                                                                                                                                                                                                                                                                                                                                                                                                                                                                                                         |
|------------|----------------------------------------------------------------------------------------------------------------------------------------------------------------------------------------------------------------------------------------------------------------------------------------------------------------------------------------------------------------------------------------------------------------------------------------------------------------------------------------------------------------------------------------------------------------------------------------------------------------------------------------------------------------------------------------------------------------------------------------------------------------------------------------------------------------------------------------------------------|
| Figure 1f  | Naïve ( $397.2 \pm 8.3$ , $n = 16$ ), MPTP ( $179.3 \pm 17.0$ , $n = 16$ ), MPTP+ACU ( $367.7 \pm 13.1$ , $n = 16$ ), MPTP+Lido+ACU ( $222.8 \pm 17.2$ , $n = 12$ ), SCNx+MPTP+ACU ( $39.2 \pm 12.6$ , $n = 5$ ), MPTP+nonACU ( $164.2 \pm 10.8$ , $n = 10$ )<br>The data were not normally distributed.<br>Kruskal-Wallis ANOVA test with Dunn's multiple comparison test<br>$H(6) = 59.65$ , $p < 0.001$                                                                                                                                                                                                                                                                                                                                                                                                                                               |
| Figure 1g  | Naïve ( $24.8 \pm 1.5$ , $n = 18$ ), MPTP ( $6.7 \pm 0.7$ , $n = 18$ ), MPTP+ACU ( $21.7 \pm 0.9$ , $n = 18$ ), MPTP+Lido+ACU ( $8.3 \pm 0.9$ , $n = 14$ ), SCNx+MPTP+ACU ( $5.6 \pm 1.0$ , $n = 8$ ), MPTP+nonACU ( $5.9 \pm 1.0$ , $n = 14$ )<br>One-way ANOVA with Tukey's multiple comparisons test<br>$F(5, 84) = 70.56$ , $p < 0.001$                                                                                                                                                                                                                                                                                                                                                                                                                                                                                                              |
| Figure 1i  | Naïve ( $9.5 \pm 0.2$ , $n = 14$ ), MPTP ( $5.4 \pm 0.2$ , $n = 14$ ), MPTP+ACU ( $8.8 \pm 0.3$ , $n = 14$ ), MPTP+Lido+ACU ( $5.7 \pm 0.2$ , $n = 10$ ), SCNx+MPTP+ACU ( $5.3 \pm 0.2$ , $n = 10$ ), MPTP+nonACU ( $5.5 \pm 0.3$ , $n = 11$ )<br>One-way ANOVA with Tukey's multiple comparisons test<br>$F(5, 67) = 54.91$ , $p < 0.001$                                                                                                                                                                                                                                                                                                                                                                                                                                                                                                               |
| Figure 1j  | Naïve ( $39.0 \pm 1.6$ , $n = 14$ ), MPTP ( $19.5 \pm 1.4$ , $n = 14$ ), MPTP+ACU ( $33.2 \pm 1.3$ , $n = 14$ ), MPTP+Lido+ACU ( $22.6 \pm 1.3$ , $n = 10$ ), SCNx+MPTP+ACU ( $21.3 \pm 1.3$ , $n = 10$ ), MPTP+nonACU ( $19.1 \pm 1.0$ , $n = 16$ )<br>One-way ANOVA with Tukey's multiple comparisons test<br>$F(5, 72) = 41.20$ , $p < 0.001$                                                                                                                                                                                                                                                                                                                                                                                                                                                                                                         |
| Figure 1k  | Naïve ( $72.5 \pm 3.3$ , $n = 11$ ), MPTP ( $49.3 \pm 3.0$ , $n = 11$ ), MPTP+ACU ( $69.5 \pm 3.6$ , $n = 11$ ), MPTP+Lido+ACU ( $41.3 \pm 2.7$ , $n = 11$ ), SCNx+MPTP+ACU ( $34.9 \pm 3.7$ , $n = 11$ ), MPTP+nonACU ( $44.9 \pm 3.3$ , $n = 11$ )<br>One-way ANOVA with Tukey's multiple comparisons test<br>$F(5, 60) = 25.49$ , $p < 0.001$                                                                                                                                                                                                                                                                                                                                                                                                                                                                                                         |
| Figure 1l  | Naïve ( $73.6 \pm 2.8$ , $n = 11$ ), MPTP ( $46.7 \pm 3.0$ , $n = 11$ ), MPTP+ACU ( $70.6 \pm 3.1$ , $n = 11$ ), MPTP+Lido+ACU ( $43.8 \pm 2.8$ , $n = 11$ ), SCNx+MPTP+ACU ( $37.4 \pm 3.6$ , $n = 11$ ), MPTP+nonACU ( $44.8 \pm 2.8$ , $n = 11$ )<br>One-way ANOVA with Tukey's multiple comparisons test<br>$F(5, 48) = 18.93$ , $p < 0.001$                                                                                                                                                                                                                                                                                                                                                                                                                                                                                                         |
| Figure 2e  | Rt. ACU ( $5.0 \pm 0.5$ , $n = 11$ ), Rt. nonACU ( $1.5 \pm 0.4$ , $n = 11$ ), Lido + Rt. AU ( $1.7 \pm 0.4$ , $n = 11$ )<br>Repeated-Measure one-way ANOVA with Dunnett's multiple comparisons test (compared with Rt. ACU group)<br>$F(2, 20) = 18.92$ , $p < 0.001$                                                                                                                                                                                                                                                                                                                                                                                                                                                                                                                                                                                   |
| Figure 2i  | CTL ( $14.45 \pm 1.4$ , $n = 3$ ), CNO ( $26.90 \pm 1.9$ , $n = 4$ )<br>Unpaired t test, $p < 0.001$                                                                                                                                                                                                                                                                                                                                                                                                                                                                                                                                                                                                                                                                                                                                                     |
| Figure 3b  | Naïve ( $423.1 \pm 13.0$ , $n = 19$ ), MPTP ( $83.3 \pm 13.6$ , $n = 15$ ), MPTP+ACU ( $331.6 \pm 19.0$ , $n = 9$ ), MPTP+hM4Di+ACU ( $61.2 \pm 7.6$ , $n = 13$ ), MPTP+hM3Dq ( $355.2 \pm 18.4$ , $n = 21$ )<br>One-way ANOVA with Tukey's multiple comparisons test<br>$F(4, 72) = 112.8$ , $p < 0.001$                                                                                                                                                                                                                                                                                                                                                                                                                                                                                                                                                |
| Figure 3c  | Naïve ( $19.8 \pm 1.2$ , $n = 19$ ), MPTP ( $3.8 \pm 0.8$ , $n = 15$ ), MPTP+ACU ( $21.1 \pm 1.4$ , $n = 9$ ), MPTP+hM4Di+ACU ( $3.9 \pm 0.4$ , $n = 13$ ), MPTP+hM3Dq ( $22.7 \pm 1.8$ , $n = 21$ )<br>One-way ANOVA with Tukey's multiple comparisons test<br>$F(4, 72) = 47.05$ , $p < 0.001$                                                                                                                                                                                                                                                                                                                                                                                                                                                                                                                                                         |
| Figure 3e  | Naïve ( $8.5 \pm 0.3$ , $n = 11$ ), MPTP ( $5.2 \pm 0.3$ , $n = 11$ ), MPTP+ACU ( $8.6 \pm 0.2$ , $n = 11$ ), MPTP+hM4Di+ACU ( $5.0 \pm 0.2$ , $n = 11$ ), MPTP+hM3Dq ( $8.4 \pm 0.5$ , $n = 11$ )<br>The data were not normally distributed.<br>Kruskal-Wallis ANOVA test with a Dunn's multiple comparison test, $p < 0.001$<br>$H(5) = 37.32$ , $p < 0.001$                                                                                                                                                                                                                                                                                                                                                                                                                                                                                           |
| Figure 3f  | Naïve ( $32.7 \pm 0.5$ , $n = 10$ ), MPTP ( $13.4 \pm 0.5$ , $n = 15$ ), MPTP+ACU ( $26.9 \pm 0.8$ , $n = 12$ ), MPTP+hM4Di+ACU ( $13.3 \pm 0.7$ , $n = 12$ ), MPTP+hM3Dq ( $28.7 \pm 0.9$ , $n = 10$ )<br>One-way ANOVA with Tukey's multiple comparisons test<br>$F(4, 54) = 177$ , $p < 0.001$                                                                                                                                                                                                                                                                                                                                                                                                                                                                                                                                                        |
| Figure 3g  | Naïve ( $75.1 \pm 2.1$ , $n = 19$ ), MPTP ( $42.7 \pm 3.0$ , $n = 15$ ), MPTP+ACU ( $75.6 \pm 3.4$ , $n = 9$ ), MPTP+hM4Di+ACU ( $34.3 \pm 2.1$ , $n = 13$ ), MPTP+hM3Dq ( $74.0 \pm 1.8$ , $n = 21$ )<br>One-way ANOVA with Tukey's multiple comparisons test<br>$F(4, 72) = 73.2$ , $p < 0.001$                                                                                                                                                                                                                                                                                                                                                                                                                                                                                                                                                        |
| Figure 3h  | Naïve ( $74.7 \pm 1.3$ , $n = 19$ ), MPTP ( $35.3 \pm 3.3$ , $n = 17$ ), MPTP+ACU ( $72.3 \pm 1.7$ , $n = 9$ ), MPTP+hM4Di+ACU ( $33.9 \pm 3.3$ , $n = 15$ ), MPTP+hM3Dq ( $69.9 \pm 1.7$ , $n = 23$ )<br>One-way ANOVA with Tukey's multiple comparisons test<br>$F(4, 78) = 72.45$ , $p < 0.001$                                                                                                                                                                                                                                                                                                                                                                                                                                                                                                                                                       |
| Figure 3j  | Naïve ( $168.7 \pm 12.9$ , $n = 10$ ), MPTP ( $101.8 \pm 9.2$ , $n = 10$ ), MPTP+ACU ( $183.7 \pm 22.4$ , $n = 10$ ), MPTP+hM4Di+ACU ( $99.2 \pm 16.2$ , $n = 10$ ), MPTP+hM3Dq ( $175.9 \pm 25.6$ , $n = 10$ )<br>One-way ANOVA with Tukey's multiple comparisons test<br>$F(4, 45) = 5.213$ , $p = 0.0015$                                                                                                                                                                                                                                                                                                                                                                                                                                                                                                                                             |
| Figure 4e  | Multiple unpaired two-tailed t-test<br>-2.6 mm: Ventromedial ( $16.2 \pm 0.8$ , $n = 6$ ), Dorsolateral ( $8.9 \pm 1.4$ , $n = 6$ ), $p = 0.001088$<br>-2.8 mm: Ventromedial ( $16.0 \pm 1.9$ , $n = 6$ ), Dorsolateral ( $12.1 \pm 1.5$ , $n = 6$ ), $p = 0.140115$<br>-3.0 mm: Ventromedial ( $13.9 \pm 2.4$ , $n = 6$ ), Dorsolateral ( $11.2 \pm 2.0$ , $n = 6$ ), $p = 0.404874$<br>-3.2 mm: Ventromedial ( $16.5 \pm 2.6$ , $n = 6$ ), Dorsolateral ( $10.3 \pm 1.3$ , $n = 6$ ), $p = 0.060982$<br>-3.4 mm: Ventromedial ( $17.0 \pm 0.8$ , $n = 6$ ), Dorsolateral ( $10.3 \pm 1.1$ , $n = 6$ ), $p = 0.000603$<br>-3.6 mm: Ventromedial ( $10.2 \pm 1.5$ , $n = 6$ ), Dorsolateral ( $12.4 \pm 2.1$ , $n = 6$ ), $p = 0.416505$<br>-3.8 mm: Ventromedial ( $13.6 \pm 1.9$ , $n = 6$ ), Dorsolateral ( $9.9 \pm 1.5$ , $n = 6$ ), $p = 0.160308$ |
| Figure 4k  | mCherry <sup>+</sup> ( $-33.4 \pm 1.6$ , $n = 10$ ), GFP <sup>+</sup> ( $-28.9 \pm 0.8$ , $n = 10$ )<br>Unpaired two-tailed t-test, $p = 0.023$                                                                                                                                                                                                                                                                                                                                                                                                                                                                                                                                                                                                                                                                                                          |
| Figure 4l  | Multiple unpaired two-tailed t-test<br>-120 pA: mCherry <sup>+</sup> ( $0.0 \pm 0.0$ , $n = 10$ ), GFP <sup>+</sup> ( $0.0 \pm 0.0$ , $n = 10$ ), $p = 0.135$                                                                                                                                                                                                                                                                                                                                                                                                                                                                                                                                                                                                                                                                                            |

|           |                                                                                                                                                                                                                                                                                                                                                                                                                                                                                                                                                                                                                                                                                                                                                                                                                                                                                                                                                                                                                                                                                                                                                                                                                                                                                                                                                                                                                                                                                                                                                                                                                                                                                                                                                                                                  |
|-----------|--------------------------------------------------------------------------------------------------------------------------------------------------------------------------------------------------------------------------------------------------------------------------------------------------------------------------------------------------------------------------------------------------------------------------------------------------------------------------------------------------------------------------------------------------------------------------------------------------------------------------------------------------------------------------------------------------------------------------------------------------------------------------------------------------------------------------------------------------------------------------------------------------------------------------------------------------------------------------------------------------------------------------------------------------------------------------------------------------------------------------------------------------------------------------------------------------------------------------------------------------------------------------------------------------------------------------------------------------------------------------------------------------------------------------------------------------------------------------------------------------------------------------------------------------------------------------------------------------------------------------------------------------------------------------------------------------------------------------------------------------------------------------------------------------|
|           | <p>-100 pA: mCherry<sup>+</sup> (0.0 ± 0.0, n = 10), GFP<sup>+</sup> (0.0 ± 0.0, n = 10), p = 0.135<br/> -80 pA: mCherry<sup>+</sup> (0.0 ± 0.0, n = 10), GFP<sup>+</sup> (0.0 ± 0.0, n = 10), p = 0.135<br/> -60 pA: mCherry<sup>+</sup> (0.0 ± 0.0, n = 10), GFP<sup>+</sup> (0.0 ± 0.0, n = 10), p = 0.135<br/> -40 pA: mCherry<sup>+</sup> (0.0 ± 0.0, n = 10), GFP<sup>+</sup> (0.0 ± 0.0, n = 10), p = 0.135<br/> -20 pA: mCherry<sup>+</sup> (0.0 ± 0.0, n = 10), GFP<sup>+</sup> (0.0 ± 0.0, n = 10), p = 0.135<br/> 0 pA: mCherry<sup>+</sup> (0.6 ± 0.4, n = 10), GFP<sup>+</sup> (0.1 ± 0.1, n = 10), p = 0.269<br/> 20 pA: mCherry<sup>+</sup> (6.2 ± 2.3, n = 10), GFP<sup>+</sup> (2.3 ± 1.1, n = 10), p = 0.141<br/> 40 pA: mCherry<sup>+</sup> (10.9 ± 3.9, n = 10), GFP<sup>+</sup> (5.6 ± 1.8, n = 10), p = 0.233<br/> 60 pA: mCherry<sup>+</sup> (15.2 ± 5.2, n = 10), GFP<sup>+</sup> (8.7 ± 2.9, n = 10), p = 0.294<br/> 80 pA: mCherry<sup>+</sup> (18.4 ± 5.6, n = 10), GFP<sup>+</sup> (10.7 ± 3.8, n = 10), p = 0.271<br/> 100 pA: mCherry<sup>+</sup> (21.7 ± 5.8, n = 10), GFP<sup>+</sup> (12.6 ± 4.5, n = 10), p = 0.230<br/> 120 pA: mCherry<sup>+</sup> (21.9 ± 5.4, n = 10), GFP<sup>+</sup> (13.8 ± 5.0, n = 10), p = 0.286<br/> 140 pA: mCherry<sup>+</sup> (24.5 ± 5.6, n = 10), GFP<sup>+</sup> (14.3 ± 5.0, n = 10), p = 0.190<br/> 160 pA: mCherry<sup>+</sup> (26.4 ± 5.8, n = 10), GFP<sup>+</sup> (11.7 ± 4.1, n = 10), p = 0.054<br/> 180 pA: mCherry<sup>+</sup> (27.3 ± 6.0, n = 10), GFP<sup>+</sup> (8.4 ± 2.9, n = 10), p = 0.010<br/> 200 pA: mCherry<sup>+</sup> (29.3 ± 6.5, n = 10), GFP<sup>+</sup> (6.7 ± 2.3, n = 10), p = 0.004<br/> 220 pA: mCherry<sup>+</sup> (30.4 ± 7.0, n = 10), GFP<sup>+</sup> (5.6 ± 1.7, n = 10), p = 0.003</p> |
| Figure 4m | <p>mCherry<sup>+</sup> (-120, 3.1 ± 0.8, n = 10; -100, 3.0 ± 1.0, n = 10; -80, 2.9 ± 1.0, n = 10; -60, 2.7 ± 1.0, n = 10; -40, 2.0 ± 1.1, n = 10; -20, 1.4 ± 1.0, n = 10; 0, 0.1 ± 0.1, n = 10; 20, 0.0 ± 0.0, n = 10; 40, 0.0 ± 0.0, n = 10; 60, 0.0 ± 0.0, n = 10; 80, 0.0 ± 0.0, n = 10; 100, 0.0 ± 0.0, n = 10; 120, 0.0 ± 0.0, n = 10; 140, 0.0 ± 0.0, n = 10; 160, 0.0 ± 0.0, n = 10; 180, 0.0 ± 0.0, n = 10; 200, 0.0 ± 0.0, n = 10; 220, 0.0 ± 0.0, n = 10), GFP<sup>+</sup> (-120, 1.1 ± 0.4, n = 10; -100, 0.9 ± 0.3, n = 10; -80, 0.8 ± 0.3, n = 10; -60, 0.5 ± 0.2, n = 10; -40, 0.1 ± 0.1, n = 10; -20, 0.1 ± 0.1, n = 10; 0, 0.0 ± 0.0, n = 10; 20, 0.0 ± 0.0, n = 10; 40, 0.0 ± 0.0, n = 10; 60, 0.0 ± 0.0, n = 10; 80, 0.0 ± 0.0, n = 10; 100, 0.0 ± 0.0, n = 10; 120, 0.0 ± 0.0, n = 10; 140, 0.0 ± 0.0, n = 10; 160, 0.0 ± 0.0, n = 10; 180, 0.0 ± 0.0, n = 10; 200, 0.0 ± 0.0, n = 10; 220, 0.0 ± 0.0, n = 10)<br/> Two-way ANOVA with Sidak's multiple comparisons test<br/> Interaction, F (17, 306) = 3.604, p &lt; 0.0001; Injected currents, F (1.235, 22.22) = 10.33, p = 0.0025; Neuron subtype, F (1, 18) = 3.997, p = 0.0609</p>                                                                                                                                                                                                                                                                                                                                                                                                                                                                                                                                                                                                                                     |
| Figure 5b | <p>Naïve (398.7 ± 19.0, n = 13), MPTP (25.2 ± 3.9, n = 14), MPTP+ACU (370.2 ± 18.7, n = 11), MPTP+hM4Di+ACU (48.4 ± 7.5, n = 9), MPTP+hM3Dq (215.9 ± 16.8, n = 8)<br/> One-way ANOVA with Tukey's multiple comparisons test<br/> F (4, 50) = 156, p &lt; 0.001</p>                                                                                                                                                                                                                                                                                                                                                                                                                                                                                                                                                                                                                                                                                                                                                                                                                                                                                                                                                                                                                                                                                                                                                                                                                                                                                                                                                                                                                                                                                                                               |
| Figure 5c | <p>Naïve (17.9 ± 1.5, n = 16), MPTP (4.8 ± 0.3, n = 14), MPTP+ACU (17.2 ± 0.5, n = 11), MPTP+hM4Di+ACU (6.6 ± 0.6, n = 9), MPTP+hM3Dq (18.8 ± 0.9, n = 8)<br/> One-way ANOVA with Tukey's multiple comparisons test<br/> F (4, 53) = 46.08, p &lt; 0.001</p>                                                                                                                                                                                                                                                                                                                                                                                                                                                                                                                                                                                                                                                                                                                                                                                                                                                                                                                                                                                                                                                                                                                                                                                                                                                                                                                                                                                                                                                                                                                                     |
| Figure 5d | <p>Naïve (79.0 ± 1.9, n = 16), MPTP (35.1 ± 3.0, n = 13), MPTP+ACU (80.6 ± 2.1, n = 11), MPTP+hM4Di+ACU (66.8 ± 2.9, n = 9), MPTP+hM3Dq (34.3 ± 3.7, n = 8)<br/> One-way ANOVA with Tukey's multiple comparisons test<br/> F (4, 52) = 72.8, p &lt; 0.001</p>                                                                                                                                                                                                                                                                                                                                                                                                                                                                                                                                                                                                                                                                                                                                                                                                                                                                                                                                                                                                                                                                                                                                                                                                                                                                                                                                                                                                                                                                                                                                    |
| Figure 5e | <p>Naïve (70.2 ± 2.4, n = 16), MPTP (35.5 ± 3.1, n = 19), MPTP+ACU (69.5 ± 2.4, n = 11), MPTP+hM4Di+ACU (57.5 ± 1.2, n = 9), MPTP+hM3Dq (38.1 ± 2.5, n = 8)<br/> One-way ANOVA with Tukey's multiple comparisons test<br/> F (4, 58) = 39.11, p &lt; 0.001</p>                                                                                                                                                                                                                                                                                                                                                                                                                                                                                                                                                                                                                                                                                                                                                                                                                                                                                                                                                                                                                                                                                                                                                                                                                                                                                                                                                                                                                                                                                                                                   |
| Figure 5g | <p>Naïve (9.2 ± 0.4, n = 10), MPTP (5.6 ± 0.2, n = 10), MPTP+ACU (9.2 ± 0.4, n = 10), MPTP+hM4Di+ACU (5.9 ± 0.4, n = 9), MPTP+hM3Dq (8.2 ± 0.3, n = 7)<br/> One-way ANOVA with Tukey's multiple comparisons test<br/> F (4, 41) = 28.7, p &lt; 0.001</p>                                                                                                                                                                                                                                                                                                                                                                                                                                                                                                                                                                                                                                                                                                                                                                                                                                                                                                                                                                                                                                                                                                                                                                                                                                                                                                                                                                                                                                                                                                                                         |
| Figure 5h | <p>Naïve (32.2 ± 0.6, n = 10), MPTP (16.4 ± 0.8, n = 10), MPTP+ACU (28.0 ± 0.8, n = 10), MPTP+hM4Di+ACU (15.7 ± 0.6, n = 9), MPTP+hM3Dq (24.7 ± 0.9, n = 7)<br/> One-way ANOVA with Tukey's multiple comparisons test<br/> F (4, 41) = 99.9, p &lt; 0.001</p>                                                                                                                                                                                                                                                                                                                                                                                                                                                                                                                                                                                                                                                                                                                                                                                                                                                                                                                                                                                                                                                                                                                                                                                                                                                                                                                                                                                                                                                                                                                                    |
| Figure 5j | <p>Naïve (384.3 ± 19.0, n = 16), MPTP (61.6 ± 12.5, n = 14), MPTP+ACU (336.0 ± 24.9, n = 11), MPTP+hM4Di+ACU (199.4 ± 17.9, n = 10), MPTP+hM3Dq (45.4 ± 8.0, n = 10)<br/> One-way ANOVA with Tukey's multiple comparisons test<br/> F (4, 56) = 79.68, p &lt; 0.001</p>                                                                                                                                                                                                                                                                                                                                                                                                                                                                                                                                                                                                                                                                                                                                                                                                                                                                                                                                                                                                                                                                                                                                                                                                                                                                                                                                                                                                                                                                                                                          |
| Figure 5k | <p>Naïve (20.3 ± 0.8, n = 16), MPTP (4.6 ± 0.5, n = 14), MPTP+ACU (17.5 ± 0.7, n = 11), MPTP+hM4Di+ACU (14.2 ± 0.6, n = 10), MPTP+hM3Dq (8.5 ± 1.2, n = 10)<br/> One-way ANOVA with Tukey's multiple comparisons test<br/> F (4, 56) = 82.8, p &lt; 0.001</p>                                                                                                                                                                                                                                                                                                                                                                                                                                                                                                                                                                                                                                                                                                                                                                                                                                                                                                                                                                                                                                                                                                                                                                                                                                                                                                                                                                                                                                                                                                                                    |
| Figure 5l | <p>Naïve (76.3 ± 2.6, n = 16), MPTP (34.1 ± 1.8, n = 14), MPTP+ACU (77.6 ± 2.0, n = 11), MPTP+hM4Di+ACU (44.8 ± 2.4, n = 10), MPTP+hM3Dq (67.4 ± 4.1, n = 10)<br/> One-way ANOVA with Tukey's multiple comparisons test<br/> F (4, 56) = 60.4, p &lt; 0.001</p>                                                                                                                                                                                                                                                                                                                                                                                                                                                                                                                                                                                                                                                                                                                                                                                                                                                                                                                                                                                                                                                                                                                                                                                                                                                                                                                                                                                                                                                                                                                                  |
| Figure 5m | <p>Naïve (73.3 ± 1.3, n = 16), MPTP (38.1 ± 3.1, n = 15), MPTP+ACU (74.2 ± 1.5, n = 11), MPTP+hM4Di+ACU (39.8 ± 2.1, n = 10), MPTP+hM3Dq (70.0 ± 2.4, n = 10)<br/> One-way ANOVA with Tukey's multiple comparisons test<br/> F (4, 57) = 67.9, p &lt; 0.001</p>                                                                                                                                                                                                                                                                                                                                                                                                                                                                                                                                                                                                                                                                                                                                                                                                                                                                                                                                                                                                                                                                                                                                                                                                                                                                                                                                                                                                                                                                                                                                  |
| Figure 5o | <p>Naïve (8.5 ± 0.3, n = 11), MPTP (4.7 ± 0.2, n = 12), MPTP+ACU (7.3 ± 0.3, n = 8), MPTP+hM4Di+ACU (5.6 ± 0.3, n = 10), MPTP+hM3Dq (4.8 ± 0.2, n = 10)<br/> The data were not normally distributed.<br/> Kruskal-Wallis ANOVA test with a Dunn's multiple comparison test, p &lt; 0.001<br/> H (5) = 35.89, p &lt; 0.001</p>                                                                                                                                                                                                                                                                                                                                                                                                                                                                                                                                                                                                                                                                                                                                                                                                                                                                                                                                                                                                                                                                                                                                                                                                                                                                                                                                                                                                                                                                    |
| Figure 5p | <p>Naïve (34.2 ± 0.5, n = 11), MPTP (16.0 ± 0.7, n = 12), MPTP+ACU (28.2 ± 1.2, n = 8), MPTP+hM4Di+ACU (20.0 ± 1.2, n = 10), MPTP+hM3Dq (19.3 ± 0.9, n = 10)<br/> One-way ANOVA with Tukey's multiple comparisons test</p>                                                                                                                                                                                                                                                                                                                                                                                                                                                                                                                                                                                                                                                                                                                                                                                                                                                                                                                                                                                                                                                                                                                                                                                                                                                                                                                                                                                                                                                                                                                                                                       |

|           |                                                                                                                                                                                                                                                                                                                                                                                           |
|-----------|-------------------------------------------------------------------------------------------------------------------------------------------------------------------------------------------------------------------------------------------------------------------------------------------------------------------------------------------------------------------------------------------|
|           | F (4, 46) = 74.4, p < 0.001                                                                                                                                                                                                                                                                                                                                                               |
| Figure 6b | Naïve (430.8 ± 18.2, n = 6), MPTP (142.7 ± 15.8, n = 6), MPTP+ACU (355.7 ± 25.2, n = 6), MPTP+MCH (274.7 ± 52.2, n = 6), MPTP+7c+ACU (182.5 ± 26.2, n = 6), MPTP+7c (166.8 ± 29.5, n = 6)<br>One-way ANOVA with Tukey's multiple comparisons test<br>F (5, 30) = 14.6, p < 0.001                                                                                                          |
| Figure 6c | Naïve (14.7 ± 1.2, n = 6), MPTP (3.0 ± 1.0, n = 6), MPTP+ACU (12.3 ± 1.0, n = 6), MPTP+MCH (9.0 ± 1.4, n = 6), MPTP+7c+ACU (6.2 ± 1.0, n = 6), MPTP+7c (3.0 ± 0.7, n = 6)<br>One-way ANOVA with Tukey's multiple comparisons test<br>F (5, 30) = 19.8, p < 0.001                                                                                                                          |
| Figure 6d | Naïve (75.4 ± 3.8, n = 6), MPTP (50.5 ± 2.1, n = 6), MPTP+ACU (70.8 ± 1.7, n = 6), MPTP+MCH (62.2 ± 2.5, n = 6), MPTP+7c+ACU (52.5 ± 3.3, n = 6), MPTP+7c (46.8 ± 6.9, n = 6)<br>The data were not normally distributed.<br>Kruskal-Wallis ANOVA test with a Dunn's multiple comparison test, p < 0.001<br>H (6) = 25.46, p < 0.001                                                       |
| Figure 6e | Naïve (75.7 ± 3.4, n = 6), MPTP (42.3 ± 5.3, n = 6), MPTP+ACU (70.0 ± 2.5, n = 6), MPTP+MCH (65.6 ± 3.0, n = 6), MPTP+7c+ACU (51.6 ± 2.0, n = 6), MPTP+7c (45.9 ± 4.2, n = 6)<br>The data were not normally distributed.<br>Kruskal-Wallis ANOVA test with a Dunn's multiple comparison test, p < 0.001<br>H (6) = 28.31, p < 0.001                                                       |
| Figure 6g | Naïve (361.9 ± 11.5, n = 13), MPTP (96.3 ± 7.6, n = 16), MPTP+ACU+shScr (SNpc) (321.6 ± 18.9, n = 8), MPTP+ACU+shMCHR1 (SNpc) (189.4 ± 21.9, n = 8), MPTP+ACU+shScr (HPC) (350.4 ± 14.6, n = 8), MPTP+ACU+shMCHR1 (HPC) (339.0 ± 13.8, n = 8)<br>One-way ANOVA with Tukey's multiple comparisons test<br>F (5, 55) = 79.2, p < 0.001                                                      |
| Figure 6h | Naïve (25.2 ± 1.1, n = 13), MPTP (11.4 ± 0.8, n = 15), MPTP+ACU+shScr (SNpc) (22.8 ± 1.0, n = 9), MPTP+ACU+shMCHR1 (SNpc) (16.4 ± 1.1, n = 9), MPTP+ACU+shScr (HPC) (26.1 ± 0.9, n = 8), MPTP+ACU+shMCHR1 (HPC) (24.4 ± 1.4, n = 8)<br>One-way ANOVA with Tukey's multiple comparisons test<br>F (5, 56) = 38.2, p < 0.001                                                                |
| Figure 6i | Naïve (78.5 ± 1.5, n = 13), MPTP (57.3 ± 1.8, n = 16), MPTP+ACU+shScr (SNpc) (71.5 ± 2.7, n = 8), MPTP+ACU+shMCHR1 (SNpc) (62.4 ± 4.5, n = 9), MPTP+ACU+shScr (HPC) (75.2 ± 1.9, n = 8), MPTP+ACU+shMCHR1 (HPC) (59.1 ± 3.8, n = 8)<br>The data were not normally distributed.<br>Kruskal-Wallis ANOVA test with a Dunn's multiple comparison test, p < 0.001<br>H (6) = 37.75, p < 0.001 |
| Figure 6j | Naïve (79.6 ± 3.1%, n = 13), MPTP (49.5 ± 3.1, n = 16), MPTP+ACU+shScr (SNpc) (73.4 ± 5.8, n = 8), MPTP+ACU+shMCHR1 (SNpc) (60.7 ± 4.3, n = 9), MPTP+ACU+shScr (HPC) (77.3 ± 2.8, n = 8), MPTP+ACU+shMCHR1 (HPC) (56.5 ± 2.4, n = 8)<br>One-way ANOVA with Tukey's multiple comparisons test<br>F (5, 56) = 14.2, p < 0.001                                                               |
| Figure 7e | Control (90.3 ± 4.4, n = 6), MPP <sup>+</sup> (23.8 ± 3.9, n = 6), Control+MCH (91.8 ± 5.4%, n = 6), MPP <sup>+</sup> +MCH (54.8 ± 4.2, n = 6)<br>One-way ANOVA with Tukey's multiple comparisons test<br>F (3, 20) = 51.42, p < 0.001                                                                                                                                                    |
| Figure 7f | Control (98.0 ± 3.8, n = 6), MPP <sup>+</sup> (23.0 ± 3.4, n = 6), Control+MCH (95.3 ± 6.2, n = 6), MPP <sup>+</sup> +MCH (55.3 ± 3.8, n = 6)<br>One-way ANOVA with Tukey's multiple comparisons test<br>F (3, 20) = 65.05, p < 0.001                                                                                                                                                     |
| Figure 7g | Control (0.9 ± 0.0, n = 3), MPP <sup>+</sup> (0.7 ± 0.0%, n = 3), Control+MCH (1.1 ± 0.0, n = 3), MPP <sup>+</sup> +MCH (1.0 ± 0.0, n = 3)<br>One-way ANOVA with Tukey's multiple comparisons test<br>F (3, 8) = 39.27, p < 0.001                                                                                                                                                         |
| Figure 7i | Naïve (760.5 ± 43.3, n = 85), MPTP (1457.6 ± 209.4, n = 23), MPTP+ACU (467.2 ± 23.4, n = 89), MPTP+hM3Dq (582.7 ± 41.8, n = 44)<br>One-way ANOVA with Tukey's multiple comparisons test<br>F (3, 237) = 34.6, p < 0.001                                                                                                                                                                   |
| Figure 7j | Naïve (125.0 ± 12.3, n = 79), MPTP (550.1 ± 91.7, n = 23), MPTP+ACU (121.9 ± 10.6, n = 89), MPTP+hM3Dq (223.6 ± 25.3, n = 44)<br>One-way ANOVA with Tukey's multiple comparisons test<br>F (3, 231) = 39.82, p < 0.001                                                                                                                                                                    |
| Figure 7k | Naïve (474.7 ± 30.9, n = 42), MPTP (885.4 ± 54.2, n = 39), MPTP+ACU (631.5 ± 35.7, n = 46), MPTP+hM3Dq (622.9 ± 34.1, n = 42)<br>The data were not normally distributed.<br>Kruskal-Wallis ANOVA test with Dunn's multiple comparison test<br>H (4) = 40.60, p < 0.001                                                                                                                    |
| Figure 7l | Naïve (82.8 ± 8.1, n = 42), MPTP (320.2 ± 18.8, n = 39), MPTP+ACU (125.2 ± 9.7, n = 100), MPTP+hM3Dq (206.6 ± 17.9, n = 42)<br>The data were not normally distributed.<br>Kruskal-Wallis ANOVA test with Dunn's multiple comparison test<br>H (4) = 83.21, p < 0.001                                                                                                                      |
| Figure 7n | Two-way ANOVA with Tukey's multiple comparisons test<br>Interaction, F (42, 1935) = 7.716, p < 0.001; Radius, F (14, 1935) = 328.4, p < 0.001; Group, F (3, 1935) = 110.6, p < 0.001                                                                                                                                                                                                      |
| Figure 7o | Naïve (19.7 ± 1.3, n = 26), MPTP (40.3 ± 2.8, n = 34), MPTP+ACU (23.0 ± 1.3, n = 36), MPTP+hM3Dq (20.1 ± 1.1, n = 40)                                                                                                                                                                                                                                                                     |



|           |                                                                                                                                                                                                                                                            |
|-----------|------------------------------------------------------------------------------------------------------------------------------------------------------------------------------------------------------------------------------------------------------------|
|           | The data were not normally distributed.<br>Kruskal-Wallis ANOVA test with Dunn's multiple comparison test<br>H (4) = 52.46, p < 0.001                                                                                                                      |
| Figure 7p | Naïve (2.4 ± 0.8, n = 28), MPTP (5.8 ± 2.9, n = 36), MPTP+ACU (2.6 ± 0.9, n = 38), MPTP+hM3Dq (2.9 ± 1.2, n = 42)<br>The data were not normally distributed.<br>Kruskal-Wallis ANOVA test with Dunn's multiple comparison test<br>H (4) = 20.82, p < 0.001 |
| Figure 7t | Naïve (138.8 ± 12.2, n = 5), MPP <sup>+</sup> (95.1 ± 7.4, n = 5), MPTP+MCH100 (127.2 ± 19.7, n = 5), MPTP+MCH200 (158.1 ± 18.3, n = 5)<br>One-way ANOVA with Tukey's multiple comparisons test<br>F (3, 16) = 3.016, p = 0.0607                           |

**Table S2. The detailed information about virus titers, volumes, and total amount for each experiment.**

| Virus                                          | Figure                                                                                    | Titer (GC/ml)         | Volume ( $\mu$ l) | Total amount (GC)     |
|------------------------------------------------|-------------------------------------------------------------------------------------------|-----------------------|-------------------|-----------------------|
| AAV <sub>DJ</sub> -pMCH-cre                    | 2 c, g / 3 a / 4 a, f / 7 h / S2 a, b, d, e / S3 a, b, l / S8 a / S9 a / S1 a / S2 a      | $5.7 \times 10^{13}$  | 1.5               | $8.55 \times 10^{10}$ |
| PRV-CAG-EGFP                                   | 2 a / S2 a, b                                                                             | $3.0 \times 10^9$     | 1.5               | $4.5 \times 10^6$     |
| PRV-CAG-RFP                                    | S2 a                                                                                      | $3.0 \times 10^9$     | 1.5               | $4.5 \times 10^6$     |
| AAV <sub>DJ</sub> -hSyn-EGFP                   | 4 a                                                                                       | $9.17 \times 10^{12}$ | 1.5               | $1.38 \times 10^{10}$ |
| AAV <sub>retro</sub> -hSyn-DIO-mCherry         | 4 f                                                                                       | $2.23 \times 10^{13}$ | 1.5               | $3.35 \times 10^{10}$ |
| AAV <sub>retro</sub> -hSyn-DIO-EGFP            | 4 f                                                                                       | $1.8 \times 10^{13}$  | 1.5               | $2.7 \times 10^{10}$  |
| AAV-pMCH-EGFP-cre                              | S2 b / S3 c / S4 c / S6 a, e / S2 d                                                       | $5.96 \times 10^{13}$ | 1.5               | $8.94 \times 10^{10}$ |
| AAV <sub>DJ</sub> -hSyn-DIO-hM3Dq-mCherry      | 3 a / 5 a, f, k, o / 7 h / S3 b, c, l / S4 d / S4 e / S5 b / S6 a, e / S8 a / S9 a / S1 a | $8.77 \times 10^{12}$ | 1.5               | $1.32 \times 10^{10}$ |
| AAV-DDC-cre                                    | S6 a                                                                                      | $8.9 \times 10^{13}$  | 1.5               | $1.34 \times 10^{11}$ |
| AAV <sub>DJ</sub> -hSyn-DIO-hM4Di-mCherry      | 3 a / 5 a, f, k, o / S3 a, l / S5 b / S1 a                                                | $1.66 \times 10^{13}$ | 1.5               | $2.49 \times 10^{10}$ |
| AAV <sub>retro</sub> -pMCH-EGFP-cre            | 5 a, f, k, o / S4 d, e / S5 b                                                             | $8.71 \times 10^{13}$ | 1.5               | $1.31 \times 10^{11}$ |
| AAV <sub>DJ</sub> -pSicoR-MCHR1sh-mCherry      | 6 f / S7 f, j                                                                             | $2.31 \times 10^{13}$ | 1.5               | $3.47 \times 10^{10}$ |
| AAV <sub>DJ</sub> -pSicoR-scr-shRNA-mCherry    | 6 f / S7 f, j                                                                             | $4.8 \times 10^{13}$  | 1.5               | $7.2 \times 10^{10}$  |
| AAV <sub>retro</sub> -hSyn-hM3Dq-mCherry       | 2 g                                                                                       | $3.53 \times 10^{13}$ | 1.5               | $5.3 \times 10^{10}$  |
| AAV <sub>DJ</sub> -CMV-A53T-SNCA               | S3 c                                                                                      | $2.42 \times 10^{13}$ | 1.5               | $3.63 \times 10^{10}$ |
| AAV <sub>5</sub> -hSYn-DIO-synpatophysin-mRuby | 4 c / S5 a                                                                                | $7.88 \times 10^{12}$ | 1.5               | $1.18 \times 10^{13}$ |

**Table S3. Sequences of oligonucleotides.**

|                                    |                                   |
|------------------------------------|-----------------------------------|
| shRNA targeting sequence: Mchr1 #1 | 5'-GCA CAA GGA GTG TCT CCT ACA-3' |
| shRNA targeting sequence: Mchr1 #2 | 5'-GCA ACG TCC CTG ACA TCT TCA-3' |
| shRNA targeting sequence: Mchr1 #3 | 5'-GCC TCA ATC CCT TTG TGT ACA-3' |
| qPCR primer for TH Forward         | AGG TCT ACA CCA CGC TGA AG        |
| qPCR primer for TH Reverse         | TAC TGG GTG CAC TGG AAC AC        |
| qPCR primer for MAP2 Forward       | CTG GCA CCC CAC CAA GTT AT        |
| qPCR primer for MAP2 Reverse       | CTT CAG GTC TGG CAG TGG TT        |
| qPCR primer for GAP43 Forward      | CCG ATG GGG TGG AGAAGAAG          |
| qPCR primer for GAP43 Reverse      | GGA GGA CGG CGA GTT ATC AG        |
| qPCR primer for TUJ1 Forward       | CAA CGA GGC CTC TTC TCA CA        |
| qPCR primer for TUJ1 Reverse       | CAG GCA GTC GCA GTT TTC AC        |
